# Supplementary material for: Regulation of S100A10 Gene Expression
Source: MDPI journal article supplement (doi:10.3390/biom11070974), 2021-07-02
Supplement: s1 [file s1]

## Regulation of S100A10 gene expression

Aleksandra Głowacka<sup>1</sup>, Paweł Bieganowski<sup>2</sup>, Ewelina Jurewicz<sup>1</sup>, Wiesława Leśniak<sup>1</sup>, Tomasz Wilanowski<sup>3#</sup>, Anna Filipek<sup>1#</sup>

<sup>1</sup>Nencki Institute of Experimental Biology, Polish Academy of Sciences, 3 Pasteur Str., 02-093 Warsaw, Poland

<sup>2</sup>Mossakowski Medical Research Institute, Polish Academy of Sciences, 5 Pawińskiego Str., 02-106, Warsaw, Poland

<sup>3</sup>University of Warsaw, Faculty of Biology, Institute of Genetics and Biotechnology, 1 Miecznikowa Str., 02-096 Warsaw, Poland

### # Corresponding authors:

Anna Filipek  
Nencki Institute of Experimental Biology PAS,  
3 Pasteur Street, 02-093 Warsaw, Poland  
Tel: +48-22-589 23 32; Fax: +48-22- 822 53 42  
E-mail: [a.filipek@nencki.edu.pl](mailto:a.filipek@nencki.edu.pl)

Tomasz Wilanowski  
University of Warsaw, Faculty of Biology, Institute of Genetics and Biotechnology,  
1 Miecznikowa Street, 02-096 Warsaw, Poland  
E-mail: [t.wilanowski@biol.uw.edu.pl](mailto:t.wilanowski@biol.uw.edu.pl)

## Materials and methods

### *Theoretical analysis of the gene encoding S100A10 protein and plasmid construction*

Theoretical analysis of putative GRHL2 transcription factor binding sites in the human *S100A10* (GENEBANK NC\_000001.11 chr.1, GRCh38.p13 region complement 151982915 - 151994859) was performed using the MatInspector program (<https://www.genomatix.de/solutions/genomatix-software-suite.html>) set at a 0.8 threshold. For the luciferase assay a reporter plasmid (pTA-Luc S100A10-GRHL2-WT) containing the luciferase gene and a 536 bp intronic sequence (chr1:151 990 668 - 151 990 132), comprising the two identified GRHL2 binding sites was constructed in the following way. At first, the respective DNA fragment was amplified using primers S100A10-GRHL2-WT-F KpnI and S100A10-GRHL2-WT-R BamHI (Table S1) and then digested with KpnI and BamHI and cloned upstream of the minimal TA promoter into the pTA-Luc plasmid (Clontech) digested with the same enzymes. Each potential binding site for the GRHL2 transcription factor was subsequently

deleted and the resulting products were named pTA-Luc-S100A10-GRHL2-ΔNo1 and pTA-Luc-S100A10-GRHL2-ΔNo2. To create plasmids carrying these deletions, the pTA-Luc-S100A10-GRHL2-WT plasmid was used as a template in a PCR reaction with primers S100A10-GRHL2-ΔNo1-F and S100A10-GRHL2-ΔNo1-R or S100A10-GRHL2-ΔNo2-F and S100A10-GRHL2-ΔNo2-R (Table S1). The products of the reaction were gel-purified and subjected to a SLIC cloning procedure [1].

#### *Cell culture and transfection*

HEK293 (Human Embryonic Kidney) cells (Sigma-Aldrich) were cultured in DMEM supplemented with 10% FBS (Gibco), 40 mM sodium bicarbonate (Sigma-Aldrich), 100 µg/ml streptomycin and 100 U/ml penicillin (both from Sigma-Aldrich) in 5% CO<sub>2</sub> at 37°C. Medium was changed every 2-3 days and the cells were passaged when confluent. To obtain transient overexpression of GRHL2 for chromatin immunoprecipitation (ChIP) experiments, HEK293 cells were transfected with EX-W2222-M12 plasmid encoding GRHL2-3xFLAG (GeneCopoeia) using Lipofectamine2000 (Life Technologies) according to the manufacturer's protocol. Cells were collected 24h after transfection.

RC-124 cells (human non-tumorigenic kidney cells) stably transfected with GRHL2-shRNA and RC-124 control cells transfected with scrambled shRNA were obtained earlier as described in [2]. Cells were cultured in McCoy's 5A (Biowest) with 10% FBS, 100 µg/ml streptomycin and 100 U/ml penicillin. Cultures were maintained in the presence of 5% CO<sub>2</sub> at 37°C. Medium was changed every 2–3 days and cells were passaged when confluent.

#### *Luciferase assay*

To check the influence of GRHL2 on *S100A10* expression the Dual-Luciferase Reporter Assay System (Promega) was applied. HEK293 cells seeded on 24-well plates were co-transfected with the pRL-SV40 reference plasmid (Promega) as an internal control and with plasmids containing the 536 bp long *S100A10* intronic sequence cloned upstream of the firefly luciferase gene. The sequence was either wild type (pTA-Luc-S100A10-GRHL2-WT) or lacked a potential GRHL2 binding site (pTA-Luc-S100A10-GRHL2-ΔNo1 and pTA-Luc-S100A10-GRHL2-ΔNo2). Cells were co-transfected with the EX-W2222-M12-GRHL2-3xFLAG (GeneCopoeia) or EX-NEG-M12-3xFLAG (control) (GeneCopoeia) plasmid. Luciferase activity was assessed after 24h using a Glomax 20/20 luminometer (Promega).

### *Chromatin immunoprecipitation (ChIP) assay*

To perform the chromatin immunoprecipitation (ChIP) experiment HEK293 cells were transfected with plasmid: EX-W2222-M12-GRHL2-3xFLAG or EX-W2222-M12-3xFLAG (control) purchased from GeneCopoeia. 24 h later cells were fixed with formaldehyde added to the medium up to 1% final concentration, lysed, sonicated for 10 min (10 cycles: 30 s sonication, 30 s off) using Bioruptor Plus (Diagenode). The approximate length of the sheared chromatin has been examined by standard agarose electrophoresis at various times (5 - 30 min) of sonication and proved to be close to 500 bp (Figure S1).

The lysate was incubated overnight with mouse IgG (control) or mouse monoclonal anti-FLAG antibody (both from Sigma-Aldrich) and the DNA-protein complexes were immunoprecipitated using Protein A/G Agarose (Sigma-Aldrich). The immunoprecipitated DNA was used as a template for PCR reactions with primers GRHL2-F and GRHL2-R flanking the two potential GRHL2 binding sites and primers Control-F and Control-R that amplify a region of *S100A10* not predicted to bind GRHL2. The PCR program included initial incubation for 3 min at 95°C and then 35 cycles of 30 s at 95°C, 30 s at 47°C and 1 min at 72°C. PCR products were separated on 1.5% agarose gel.

### *Reverse transcription-quantitative PCR (RT-qPCR)*

To confirm silencing of the gene encoding GRHL2 transcription factor in the RC-124 cell line (transfected with GRHL2 shRNA), total RNA was extracted from these cells and from control RC-124 cells (transfected with scrambled shRNA) using the ExtractMe Total RNA Kit (Blirt). Next, 1 µg of the RNA was reverse-transcribed to cDNA with the use of MMLV1 reverse transcriptase (Sigma-Aldrich) according to the manufacturer's protocol. The level of *GRHL2* mRNA was analyzed using TaqMan Fast Universal Master Mix (Applied Biosystems) with TaqMan Probes (ID: Hs02800695\_m1 for *HPRT* and Hs00227745\_m1 for *GRHL2*).

In order to assess the influence of GRHL2 transcription factor on *S100A10* mRNA level, total RNA was isolated from RC-124 cells with stably silenced *GRHL2* using the RNeasy Mini Kit (Qiagen) and 1 µg of the RNA was transcribed to cDNA as described above. *S100A10* mRNA level was then analyzed by RT-qPCR using the SYBRGreen system. The primers used were the following: S100A10-F and S100A10-R, and HPRT1-F and HPRT1-R.

RT-qPCR was performed in a 7900HT Fast Real-Time PCR System (Applied Biosystems). The obtained results were analyzed using the comparative  $\Delta\Delta C_t$  method and gene expression was normalized to the HPRT1 housekeeping gene.

#### *Statistical analysis*

Statistical analysis of data obtained in all experiments was performed with the use of Student's *t*-test. Results of at least three independent experiments are presented as means  $\pm$  standard deviation. The level of statistical significance is indicated using  $*p \leq 0.05$ ,  $**p \leq 0.01$  or  $***p \leq 0.001$ .

**Table S1. Sequences of primers.**

| Primers used in plasmid construction |                                               |
|--------------------------------------|-----------------------------------------------|
| S100A10-GRHL2-WT-F<br>KpnI           | 5'-GCACCAGGTACCTCATGCCTAACACCATGTC-3'         |
| S100A10-GRHL2-WT-R<br>BamHI          | 5'-CGTCTGGATCCTTGTAGCTCAGAGCTCAGG-3'          |
| S100A10-GRHL2- $\Delta$ No1-F        | 5'-TAGCAGGACACATATTTTTCCTTTTGC-3'             |
| S100A10-GRHL2- $\Delta$ No1-R        | 5'-AAAATATGTGTCTGCTATAGTCAGAATGACATGACTGTG-3' |
| S100A10-GRHL2- $\Delta$ No2-F        | 5'-TTAAGAAGGGAGGCGGAGACAT-3'                  |
| S100A10-GRHL2- $\Delta$ No2-R        | 5'-CTCCGCCTCCCTTCTTAAGCTCAGACAAACATGTAGAGG-3' |
| Primers used in ChIP                 |                                               |
| GRHL2-F                              | 5'-GGGACATTCAAAGTAGGTGC-3'                    |
| GRHL2-R                              | 5'-GGCCCCAAAAGTGTTCAACT-3'                    |
| Control-F                            | 5'-AGCTTAAATCTCAGGCAGAC-3'                    |
| Control-R                            | 5'-TCTCTTGGCTAGAGGATGAA-3'                    |
| Primers used in RT-qPCR              |                                               |
| S100A10-F                            | 5'-GGCTACTTAACAAAGGAGGACC-3'                  |
| S100A10-R                            | 5'-GAGGCCCGCAATTAGGGAAA-3'                    |
| HPRT1-F                              | 5'-ACCAGTCAACAGGGGACATA-3'                    |

|         |                             |
|---------|-----------------------------|
| HPRT1-R | 5'-CTTCGTGGGGTCCTTTTCACC-3' |
|---------|-----------------------------|

**Figure S1.** Agarose gel showing the approximate length of the sheared chromatin used in ChIP.

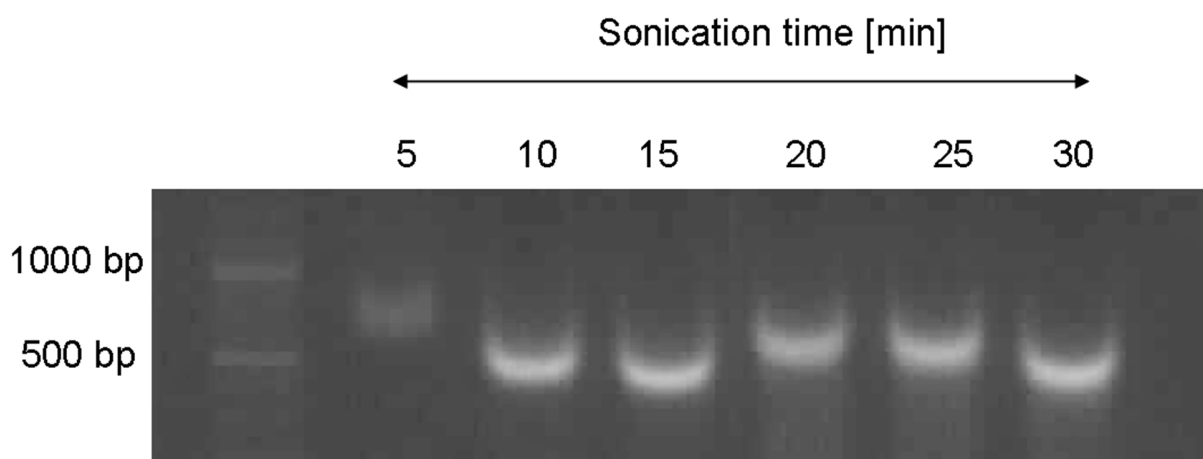

**Table S2.**

**Putative transcription binding sites in *S100A10* according to MatInspector.**

| Matrix ID | Name    | Score   | Relative score | Sequence ID | Start | End | Strand | Predicted sequence |
|-----------|---------|---------|----------------|-------------|-------|-----|--------|--------------------|
| MA0035.4  | GATA1   | 13,729  | 0,9784227      | S100A10     | 187   | 197 | -      | ttctaactga         |
| MA0809.2  | TEAD4   | 14,3618 | 0,9641916      | S100A10     | 398   | 409 | -      | gcacattccata       |
| MA1121.1  | TEAD2   | 14,4116 | 0,9580448      | S100A10     | 397   | 409 | -      | gcacattccatac      |
| MA0508.3  | PRDM1   | 13,1531 | 0,9485031      | S100A10     | 114   | 124 | -      | atctttctctg        |
| MA0079.3  | SP1     | 12,7041 | 0,9409729      | S100A10     | 126   | 136 | +      | tctccgcctcc        |
| MA1585.1  | ZKSCAN1 | 12,581  | 0,9334626      | S100A10     | 10    | 19  | +      | aaagtaggtg         |
| MA0744.2  | SCRT2   | 15,6372 | 0,9290302      | S100A10     | 142   | 157 | -      | tgagcaacaggcttta   |
| MA0599.1  | KLF5    | 9,7411  | 0,9271733      | S100A10     | 23    | 32  | -      | ctccctccct         |
| MA0090.3  | TEAD1   | 13,4552 | 0,9260518      | S100A10     | 397   | 409 | -      | gcacattccatac      |
| MA0497.1  | MEF2C   | 12,845  | 0,9059142      | S100A10     | 32    | 46  | +      | gaacacaaaatggaa    |
| MA0479.1  | FOXH1   | 9,37408 | 0,9044962      | S100A10     | 415   | 425 | -      | tagagtacaca        |
| MA1522.1  | MAZ     | 10,0846 | 0,9015073      | S100A10     | 128   | 138 | +      | tccgcctcct         |
| MA1579.1  | ZBTB26  | 11,1858 | 0,9009072      | S100A10     | 80    | 94  | +      | gagtcacagaattgtt   |
| MA0465.2  | CDX2    | 11,5472 | 0,8971283      | S100A10     | 200   | 211 | +      | cttcaataaaaag      |

|          |        |         |           |         |     |     |   |                     |
|----------|--------|---------|-----------|---------|-----|-----|---|---------------------|
| MA1108.2 | MXI1   | 7,03377 | 0,8954662 | S100A10 | 376 | 385 | + | gacacatatt          |
| MA0769.2 | TCF7   | 9,70378 | 0,8947387 | S100A10 | 5   | 15  | - | tactttgaatg         |
| MA1645.1 | NKX2-2 | 10,9934 | 0,8940783 | S100A10 | 209 | 222 | - | tgtccactcacctt      |
| MA0743.2 | SCRT1  | 13,3384 | 0,8923548 | S100A10 | 142 | 157 | - | tgagcaacaggctcta    |
| MA0079.3 | SP1    | 8,72447 | 0,8909046 | S100A10 | 22  | 32  | - | ctccctccctg         |
| MA0516.1 | SP2    | 12,1439 | 0,8888383 | S100A10 | 126 | 140 | + | tctccgcctccctc      |
| MA0083.2 | SRF    | 14,1046 | 0,8885411 | S100A10 | 30  | 47  | + | gagaacccaaaaatggaaa |
| MA1105.2 | GRHL2  | 11,4162 | 0,8876184 | S100A10 | 360 | 371 | - | taaacaggctcta       |
| MA1683.1 | FOXA3  | 9,63796 | 0,8875003 | S100A10 | 413 | 423 | - | gagtacacagg         |
| MA0018.4 | CREB1  | 10,9492 | 0,8868482 | S100A10 | 342 | 354 | + | cagtcattgtcatt      |
| MA1108.2 | MXI1   | 6,48412 | 0,8851957 | S100A10 | 173 | 182 | - | tatacatgcc          |
| MA1108.2 | MXI1   | 6,48174 | 0,8851512 | S100A10 | 162 | 171 | - | tctacatgtt          |
| MA1508.1 | IKZF1  | 11,0794 | 0,8850826 | S100A10 | 385 | 396 | - | gcaaaaggaaaa        |
| MA1104.2 | GATA6  | 11,1072 | 0,8849629 | S100A10 | 187 | 199 | - | tattctaattctga      |
| MA0047.3 | FOXA2  | 9,46208 | 0,8848897 | S100A10 | 413 | 423 | - | gagtacacagg         |
| MA0036.3 | GATA2  | 8,84809 | 0,8848845 | S100A10 | 187 | 197 | - | ttctaattctga        |
| MA0599.1 | KLF5   | 6,34072 | 0,8839158 | S100A10 | 126 | 135 | + | tctccgcctc          |
| MA1103.2 | FOXK2  | 9,48441 | 0,8818727 | S100A10 | 413 | 423 | - | gagtacacagg         |
| MA0901.2 | HOXB13 | 11,7255 | 0,8816079 | S100A10 | 200 | 213 | + | cttcaataaaagggt     |
| MA1655.1 | ZNF341 | 10,4003 | 0,8809131 | S100A10 | 225 | 236 | - | aataacagcctt        |
| MA0024.2 | E2F1   | 7,44529 | 0,8800341 | S100A10 | 23  | 33  | + | aggaggaggaga        |
| MA0479.1 | FOXH1  | 7,60655 | 0,8796315 | S100A10 | 76  | 86  | - | tggaactccaca        |
| MA1105.2 | GRHL2  | 10,8306 | 0,8758423 | S100A10 | 143 | 154 | - | gcaacagggtctt       |
| MA0593.1 | FOXP2  | 8,94845 | 0,8746824 | S100A10 | 89  | 99  | - | tggaacaacaat        |
| MA0597.1 | THAP1  | 6,75558 | 0,8743871 | S100A10 | 21  | 29  | - | cctccctga           |
| MA0052.4 | MEF2A  | 12,2782 | 0,8741616 | S100A10 | 33  | 47  | + | aaccaaaaaatggaaa    |
| MA0037.2 | GATA3  | 6,5876  | 0,8726537 | S100A10 | 189 | 196 | + | agattaga            |
| MA0063.2 | NKX2-5 | 8,27371 | 0,8700805 | S100A10 | 3   | 13  | + | gacattcaaag         |
| MA0481.3 | FOXP1  | 8,69208 | 0,8699558 | S100A10 | 413 | 423 | - | gagtacacagg         |
| MA0482.2 | GATA4  | 9,82648 | 0,8695286 | S100A10 | 328 | 339 | - | ctccttctcttc        |
| MA1115.1 | POU5F1 | 9,12918 | 0,869269  | S100A10 | 39  | 49  | + | aaatggaaaat         |
| MA0597.1 | THAP1  | 6,55651 | 0,8682948 | S100A10 | 169 | 177 | - | atgccctct           |
| MA0528.2 | ZNF263 | 10,1739 | 0,8676012 | S100A10 | 129 | 140 | - | gaaggaggaggcg       |
| MA1112.2 | NR4A1  | 8,7838  | 0,8672427 | S100A10 | 206 | 217 | + | taaaagggtgagt       |
| MA0144.2 | STAT3  | 5,68154 | 0,866384  | S100A10 | 111 | 121 | + | atgcagagaaa         |
| MA0471.2 | E2F6   | 9,98714 | 0,8663148 | S100A10 | 22  | 34  | + | caggaggaggagaa      |

|          |              |         |           |         |     |     |   |                 |
|----------|--------------|---------|-----------|---------|-----|-----|---|-----------------|
| MA0508.3 | PRDM1        | 8,85474 | 0,8659253 | S100A10 | 329 | 339 | - | ctccttctctt     |
| MA1648.1 | TCF12(var.2) | 8,27862 | 0,8648617 | S100A10 | 11  | 21  | - | agcacctactt     |
| MA0508.3 | PRDM1        | 8,79194 | 0,8647189 | S100A10 | 255 | 265 | - | tgctatctcac     |
| MA0468.1 | DUX4         | 5,29126 | 0,863296  | S100A10 | 189 | 199 | - | tattctaactt     |
| MA0063.2 | NKX2-5       | 7,95788 | 0,8629824 | S100A10 | 210 | 220 | - | tccactcacct     |
| MA0522.3 | TCF3         | 7,90104 | 0,862703  | S100A10 | 11  | 21  | - | agcacctactt     |
| MA1108.2 | MXI1         | 5,24076 | 0,8619624 | S100A10 | 401 | 410 | - | tgcacattcc      |
| MA0470.1 | E2F4         | 7,37494 | 0,8616004 | S100A10 | 24  | 34  | + | gggagggagaa     |
| MA1522.1 | MAZ          | 7,18289 | 0,8592381 | S100A10 | 23  | 33  | - | tctccctccct     |
| MA1593.1 | ZNF317       | 10,1579 | 0,8591183 | S100A10 | 424 | 435 | - | gaacagtagata    |
| MA0488.1 | JUN          | 6,33666 | 0,8567332 | S100A10 | 341 | 353 | + | acagtcattgcat   |
| MA1124.1 | ZNF24        | 13,0632 | 0,8566149 | S100A10 | 294 | 306 | - | gtttcattcatcc   |
| MA0510.1 | RFX5         | 7,20723 | 0,8563502 | S100A10 | 147 | 161 | - | tgtctgagcaacagg |
| MA1115.1 | POU5F1       | 8,49569 | 0,8552118 | S100A10 | 4   | 14  | + | acattcaaagt     |
| MA0593.1 | FOXP2        | 7,79825 | 0,8548699 | S100A10 | 413 | 423 | - | gagtacacagg     |
| MA0468.1 | DUX4         | 4,36099 | 0,8531696 | S100A10 | 46  | 56  | - | gaattcaattt     |
| MA0596.1 | SREBF2       | 9,01817 | 0,85299   | S100A10 | 291 | 300 | + | atgggatgaa      |
| MA0037.2 | GATA3        | 5,28073 | 0,8520906 | S100A10 | 330 | 337 | + | agagaagg        |
| MA0599.1 | KLF5         | 3,82933 | 0,8519673 | S100A10 | 129 | 138 | + | ccgcctccct      |
| MA0037.2 | GATA3        | 5,22756 | 0,8512538 | S100A10 | 101 | 108 | + | agagaaaa        |
| MA0492.1 | JUND(var.2)  | 5,03246 | 0,8493087 | S100A10 | 340 | 354 | + | cacagtcattgcat  |
| MA1103.2 | FOXK2        | 8,10085 | 0,849142  | S100A10 | 364 | 374 | - | tgctaaacagg     |
| MA1108.2 | MXI1         | 4,53932 | 0,8488555 | S100A10 | 160 | 169 | + | caaacatgta      |
| MA0100.3 | MYB          | 5,67086 | 0,8487535 | S100A10 | 425 | 434 | + | atctactgtt      |
| MA0093.3 | USF1         | 9,606   | 0,8477793 | S100A10 | 342 | 355 | + | cagtcattgcatc   |
| MA0492.1 | JUND(var.2)  | 4,7765  | 0,8466982 | S100A10 | 343 | 357 | - | cagaatgacatgact |
| MA0258.2 | ESR2         | 8,84369 | 0,8465998 | S100A10 | 347 | 361 | + | atgtcattctgacta |
| MA1585.1 | ZKSCAN1      | 7,3366  | 0,8464386 | S100A10 | 424 | 433 | - | acagtagata      |
| MA1115.1 | POU5F1       | 8,09152 | 0,846243  | S100A10 | 109 | 119 | + | ctatgcagaga     |
| MA1117.1 | RELB         | 8,5175  | 0,8461247 | S100A10 | 51  | 61  | + | gaattcctct      |
| MA0106.2 | TP53         | 10,8482 | 0,8460489 | S100A10 | 174 | 188 | + | gcatgtataggcatc |
| MA0852.2 | FOXK1        | 9,33871 | 0,8447249 | S100A10 | 411 | 424 | - | agagtacacaggag  |
| MA0143.4 | SOX2         | 7,23111 | 0,8445699 | S100A10 | 36  | 46  | + | caaaaatggaa     |
| MA0809.2 | TEAD4        | 8,15872 | 0,8445165 | S100A10 | 2   | 13  | + | ggacattcaaag    |
| MA0510.1 | RFX5         | 6,13985 | 0,8441806 | S100A10 | 14  | 28  | - | ctcctgagcaccta  |
| MA0037.2 | GATA3        | 4,6395  | 0,842001  | S100A10 | 271 | 278 | + | agaaaagc        |

|          |                |         |           |         |     |     |   |                 |
|----------|----------------|---------|-----------|---------|-----|-----|---|-----------------|
| MA0095.2 | YY1            | 8,05071 | 0,8416829 | S100A10 | 37  | 48  | + | aaaaatggaaaa    |
| MA0060.3 | NFYA           | 7,60742 | 0,8415331 | S100A10 | 211 | 221 | - | gtccactcacc     |
| MA1644.1 | NFYC           | 8,08342 | 0,8413562 | S100A10 | 211 | 221 | - | gtccactcacc     |
| MA0599.1 | KLF5           | 2,99184 | 0,8413133 | S100A10 | 211 | 220 | - | tccactcacc      |
| MA0712.2 | OTX2           | 6,79562 | 0,8410269 | S100A10 | 186 | 197 | + | atcagattagaa    |
| MA0103.3 | ZEB1           | 5,59228 | 0,8403021 | S100A10 | 11  | 21  | - | agcacctactt     |
| MA0526.3 | USF2           | 9,25138 | 0,8401121 | S100A10 | 342 | 355 | + | cagtcattgtcattc |
| MA0712.2 | OTX2           | 6,7002  | 0,839127  | S100A10 | 291 | 302 | + | atgggatgaatg    |
| MA1647.1 | PRDM4          | 7,60199 | 0,8384995 | S100A10 | 300 | 310 | - | tcgtgtttcat     |
| MA1111.1 | NR2F2          | 7,61342 | 0,8381636 | S100A10 | 207 | 217 | + | aaaagggtgagt    |
| MA0482.2 | GATA4          | 8,30656 | 0,8379624 | S100A10 | 187 | 198 | - | attctaattctga   |
| MA0597.1 | THAP1          | 5,52713 | 0,8367908 | S100A10 | 132 | 140 | + | cctcccttc       |
| MA0509.2 | RFX1           | 9,44904 | 0,8361894 | S100A10 | 148 | 161 | + | ctgtgtctcagaca  |
| MA1118.1 | SIX1           | 8,85203 | 0,8360971 | S100A10 | 302 | 312 | + | gaaacacgaga     |
| MA0596.1 | SREBF2         | 8,25388 | 0,8351408 | S100A10 | 344 | 353 | - | atgacatgac      |
| MA1642.1 | NEUROG2(var.2) | 7,01277 | 0,8349767 | S100A10 | 284 | 296 | + | gtagaagatggga   |
| MA0508.3 | PRDM1          | 7,2112  | 0,8343503 | S100A10 | 307 | 317 | - | tattttctcgt     |
| MA1657.1 | ZNF652         | 8,98111 | 0,8338624 | S100A10 | 318 | 329 | + | gcaagtgttaga    |
| MA0100.3 | MYB            | 4,93658 | 0,8331198 | S100A10 | 440 | 449 | - | ttcaactatg      |
| MA1125.1 | ZNF384         | 5,95587 | 0,8329432 | S100A10 | 200 | 211 | + | cttcaataaaag    |
| MA0489.1 | JUN(var.2)     | 5,2845  | 0,8329364 | S100A10 | 295 | 308 | + | gatgaatgaaacac  |
| MA1120.1 | SOX13          | 6,74531 | 0,8327961 | S100A10 | 36  | 46  | + | caaaaatggaa     |
| MA1632.1 | ATF2           | 7,15405 | 0,8316645 | S100A10 | 342 | 354 | + | cagtcattgtcatt  |
| MA0007.2 | AR             | 6,61711 | 0,8313478 | S100A10 | 377 | 391 | - | aggaaaaaatgtgt  |
| MA0593.1 | FOXP2          | 6,41979 | 0,8311257 | S100A10 | 364 | 374 | - | tgctaaacagg     |
| MA0764.2 | ETV4           | 4,93141 | 0,8307986 | S100A10 | 51  | 60  | - | ggaggaaattc     |
| MA0037.2 | GATA3          | 3,92068 | 0,8306907 | S100A10 | 115 | 122 | + | agagaaaag       |
| MA0037.2 | GATA3          | 3,92068 | 0,8306907 | S100A10 | 421 | 428 | - | agatagag        |
| MA0079.3 | SP1            | 3,93537 | 0,8306521 | S100A10 | 129 | 139 | + | ccgcctccctt     |
| MA1638.1 | HAND2          | 3,64126 | 0,8302732 | S100A10 | 118 | 127 | + | gaaagatgtc      |
| MA0100.3 | MYB            | 4,79922 | 0,8301952 | S100A10 | 317 | 326 | + | agcaagtgtt      |
| MA0258.2 | ESR2           | 7,59541 | 0,8301092 | S100A10 | 347 | 361 | - | tagtcagaatgacat |
| MA1115.1 | POU5F1         | 7,33417 | 0,8294372 | S100A10 | 390 | 400 | - | atacgcaaaag     |
| MA0507.1 | POU2F2         | 6,80292 | 0,8292878 | S100A10 | 388 | 400 | + | tccttttgcgtat   |
| MA1120.1 | SOX13          | 6,58729 | 0,8290896 | S100A10 | 106 | 116 | + | aaactatgcag     |
| MA0627.2 | POU2F3         | 7,6296  | 0,8286898 | S100A10 | 3   | 15  | + | gacattcaaagta   |



|          |              |         |           |         |     |     |   |                      |
|----------|--------------|---------|-----------|---------|-----|-----|---|----------------------|
| MA1683.1 | FOXA3        | 7,06382 | 0,8285044 | S100A10 | 364 | 374 | - | tgctaaacagg          |
| MA1631.1 | ASCL1(var.2) | 7,39739 | 0,8283739 | S100A10 | 10  | 22  | - | gagcacctacttt        |
| MA0597.1 | THAP1        | 5,24629 | 0,8281956 | S100A10 | 25  | 33  | - | tctccctcc            |
| MA1653.1 | ZNF148       | 8,76908 | 0,8280444 | S100A10 | 128 | 139 | + | tccgcctccctt         |
| MA0079.3 | SP1          | 3,72667 | 0,8280264 | S100A10 | 53  | 63  | + | attcctcctaa          |
| MA1106.1 | HIF1A        | 5,75451 | 0,8276157 | S100A10 | 13  | 22  | + | gtagggtgctc          |
| MA0144.2 | STAT3        | 2,48137 | 0,8276154 | S100A10 | 94  | 104 | - | ctctatggaaa          |
| MA0481.3 | FOXP1        | 6,77083 | 0,8272209 | S100A10 | 89  | 99  | - | tggaaaacaat          |
| MA0712.2 | OTX2         | 6,10042 | 0,8271849 | S100A10 | 232 | 243 | - | acaggataataa         |
| MA0627.2 | POU2F3       | 7,51878 | 0,8269195 | S100A10 | 38  | 50  | + | aaaatggaaaatt        |
| MA0525.1 | TP63         | 8,44859 | 0,8265241 | S100A10 | 172 | 191 | - | tctgatgcctatacatgccc |
| MA0079.3 | SP1          | 3,57462 | 0,8261134 | S100A10 | 330 | 340 | - | gctccttctct          |
| MA0620.3 | MITF         | 7,85787 | 0,8252303 | S100A10 | 340 | 357 | - | cagaatgacatgactgtg   |
| MA0620.3 | MITF         | 7,85706 | 0,8252183 | S100A10 | 340 | 357 | + | cacagtcatgtcattctg   |
| MA0764.2 | ETV4         | 4,59132 | 0,8248294 | S100A10 | 220 | 229 | + | acagcaaggc           |
| MA0148.4 | FOXA1        | 7,58322 | 0,8245471 | S100A10 | 412 | 423 | - | gagtacacagga         |
| MA1108.2 | MXI1         | 3,19737 | 0,82378   | S100A10 | 344 | 353 | - | atgacatgac           |
| MA0852.2 | FOXK1        | 8,29999 | 0,8237752 | S100A10 | 87  | 100 | - | atggaaaacaattc       |
| MA0442.2 | SOX10        | 6,06158 | 0,8237646 | S100A10 | 412 | 422 | - | agtacacagga          |
| MA0599.1 | KLF5         | 1,59528 | 0,823547  | S100A10 | 53  | 62  | + | attcctccta           |
| MA0508.3 | PRDM1        | 6,64798 | 0,8235299 | S100A10 | 100 | 110 | - | agttttctcta          |
| MA1115.1 | POU5F1       | 7,05507 | 0,823244  | S100A10 | 92  | 102 | - | ctatggaaaac          |
| MA0528.2 | ZNF263       | 7,90948 | 0,8228508 | S100A10 | 21  | 32  | + | tcaggaggaggag        |
| MA1116.1 | RBPJ         | 4,74922 | 0,8227836 | S100A10 | 92  | 101 | - | tatggaaaac           |
| MA0007.2 | AR           | 5,97588 | 0,8227221 | S100A10 | 418 | 432 | - | cagtagatagagtac      |
| MA0597.1 | THAP1        | 5,03278 | 0,8216613 | S100A10 | 39  | 47  | - | tttcattt             |
| MA0627.2 | POU2F3       | 7,16997 | 0,8213475 | S100A10 | 91  | 103 | - | tctatggaaaaca        |
| MA1596.1 | ZNF460       | 11,4062 | 0,8210805 | S100A10 | 125 | 140 | + | gtctccgcctcccttc     |
| MA0528.2 | ZNF263       | 7,80969 | 0,8208787 | S100A10 | 25  | 36  | + | ggaggggagaacc        |
| MA1111.1 | NR2F2        | 6,81054 | 0,8208055 | S100A10 | 60  | 70  | + | ctaaggtaact          |
| MA0468.1 | DUX4         | 1,37236 | 0,820637  | S100A10 | 289 | 299 | - | tcatcccatct          |
| MA0037.2 | GATA3        | 3,27945 | 0,8206011 | S100A10 | 157 | 164 | + | agacaaac             |
| MA0627.2 | POU2F3       | 7,11595 | 0,8204846 | S100A10 | 108 | 120 | + | actatgcagagaa        |
| MA1579.1 | ZBTB26       | 7,25893 | 0,8204789 | S100A10 | 70  | 84  | - | gactccacaaattta      |
| MA1638.1 | HAND2        | 3,0686  | 0,820322  | S100A10 | 286 | 295 | + | agaagatggg           |
| MA1647.1 | PRDM4        | 6,80954 | 0,8202963 | S100A10 | 363 | 373 | + | acctgtttagc          |

|          |                |         |           |         |     |     |   |                    |
|----------|----------------|---------|-----------|---------|-----|-----|---|--------------------|
| MA1647.1 | PRDM4          | 6,78181 | 0,8196593 | S100A10 | 146 | 156 | + | acctgttgctc        |
| MA0148.4 | FOXA1          | 7,26974 | 0,8184414 | S100A10 | 157 | 168 | + | agacaaacatgt       |
| MA1112.2 | NR4A1          | 6,15799 | 0,8182224 | S100A10 | 167 | 178 | + | gtagagggcatg       |
| MA1103.2 | FOXK2          | 6,78695 | 0,818059  | S100A10 | 89  | 99  | - | tggaaaacaat        |
| MA0481.3 | FOXP1          | 6,301   | 0,8167703 | S100A10 | 364 | 374 | - | tgctaaacagg        |
| MA1109.1 | NEUROD1        | 6,83042 | 0,8165439 | S100A10 | 285 | 297 | + | tagaagatgggat      |
| MA0600.1 | RFX2           | 8,92774 | 0,8161716 | S100A10 | 145 | 163 | - | ttgtctgagcaacaggtc |
| MA0507.1 | POU2F2         | 5,85036 | 0,8159873 | S100A10 | 39  | 51  | - | caattttccattt      |
| MA0036.3 | GATA2          | 5,48459 | 0,8158557 | S100A10 | 232 | 242 | + | ttattatcctg        |
| MA0047.3 | FOXA2          | 5,99001 | 0,8156263 | S100A10 | 89  | 99  | - | tggaaaacaat        |
| MA0036.3 | GATA2          | 5,47298 | 0,8156174 | S100A10 | 328 | 338 | - | tccttctcttc        |
| MA0058.2 | MAX            | 2,87399 | 0,8156128 | S100A10 | 375 | 384 | + | ggacacatat         |
| MA0684.2 | RUNX3          | 6,60503 | 0,8154138 | S100A10 | 31  | 42  | + | agaaccaaataat      |
| MA1115.1 | POU5F1         | 6,70219 | 0,8154135 | S100A10 | 163 | 173 | + | acatgtagagg        |
| MA0523.1 | TCF7L2         | 5,27708 | 0,8153667 | S100A10 | 266 | 279 | + | gcactagaaaagca     |
| MA0468.1 | DUX4           | 0,88438 | 0,8153251 | S100A10 | 66  | 76  | - | aaatttagtta        |
| MA1106.1 | HIF1A          | 5,22862 | 0,8152331 | S100A10 | 172 | 181 | - | atacatgcc          |
| MA0522.3 | TCF3           | 5,72465 | 0,8151338 | S100A10 | 316 | 326 | - | aacacttgcta        |
| MA0479.1 | FOXH1          | 3,00158 | 0,8148516 | S100A10 | 398 | 408 | - | cacattccata        |
| MA1601.1 | ZNF75D         | 5,59602 | 0,8147141 | S100A10 | 24  | 33  | + | gggaggggaga        |
| MA1108.2 | MXI1           | 2,71102 | 0,814692  | S100A10 | 317 | 326 | - | aacacttgct         |
| MA1646.1 | OSR2           | 7,20956 | 0,8146514 | S100A10 | 424 | 435 | - | gaacagtagata       |
| MA0769.2 | TCF7           | 5,90357 | 0,814059  | S100A10 | 203 | 213 | - | accttttattg        |
| MA1683.1 | FOXA3          | 6,41892 | 0,813724  | S100A10 | 89  | 99  | - | tggaaaacaat        |
| MA0148.4 | FOXA1          | 7,02546 | 0,8136835 | S100A10 | 88  | 99  | - | tggaaaacaatt       |
| MA0852.2 | FOXK1          | 7,7914  | 0,8135175 | S100A10 | 362 | 375 | - | ctgctaaacaggtc     |
| MA1581.1 | ZBTB6          | 7,44531 | 0,8134445 | S100A10 | 16  | 28  | - | ctccctgagcacc      |
| MA0764.2 | ETV4           | 3,94047 | 0,8134057 | S100A10 | 21  | 30  | + | tcaggaggagg        |
| MA0497.1 | MEF2C          | 5,96521 | 0,8129639 | S100A10 | 275 | 289 | + | aagcaaaaagtagaa    |
| MA1655.1 | ZNF341         | 7,28578 | 0,8126583 | S100A10 | 216 | 227 | + | gtggacagcaag       |
| MA0595.1 | SREBF1         | 6,54012 | 0,8124924 | S100A10 | 344 | 353 | + | gtcatgtcat         |
| MA1120.1 | SOX13          | 5,87313 | 0,8123374 | S100A10 | 85  | 95  | - | aaacaattctg        |
| MA0083.2 | SRF            | 7,75033 | 0,8120381 | S100A10 | 198 | 215 | + | tacttcaataaaaaggta |
| MA1642.1 | NEUROG2(var.2) | 5,75586 | 0,8104431 | S100A10 | 116 | 128 | + | gagaaagatgtct      |
| MA0597.1 | THAP1          | 4,6594  | 0,8102341 | S100A10 | 215 | 223 | - | ctgtccact          |
| MA0525.1 | TP63           | 7,02279 | 0,8101645 | S100A10 | 333 | 352 | + | gaaggagcacagtcgtca |

|          |              |            |           |         |     |     |   |                       |
|----------|--------------|------------|-----------|---------|-----|-----|---|-----------------------|
| MA1120.1 | SOX13        | 5,75741    | 0,8096231 | S100A10 | 437 | 447 | - | caactatgaac           |
| MA0510.1 | RFX5         | 3,10376    | 0,8095652 | S100A10 | 228 | 242 | - | caggataataacagc       |
| MA0830.2 | TCF4         | 6,8197     | 0,8095618 | S100A10 | 10  | 22  | - | gagcacctacttt         |
| MA1653.1 | ZNF148       | 7,67264    | 0,8094854 | S100A10 | 22  | 33  | - | tctccctccctg          |
| MA0782.2 | PKNOX1       | 8,74699    | 0,8093717 | S100A10 | 344 | 358 | - | tcagaatgacatgac       |
| MA1116.1 | RBPJ         | 4,0894     | 0,8089917 | S100A10 | 290 | 299 | + | gatgggatga            |
| MA0479.1 | FOXH1        | 2,57453    | 0,8088441 | S100A10 | 78  | 88  | + | tggagtccaga           |
| MA0047.3 | FOXA2        | 5,64826    | 0,8088089 | S100A10 | 422 | 432 | - | cagtagataga           |
| MA0052.4 | MEF2A        | 8,27124    | 0,808683  | S100A10 | 276 | 290 | + | agcaaaaagtagaag       |
| MA0745.2 | SNAI2        | 5,64241    | 0,8085673 | S100A10 | 142 | 154 | + | taagacctgttc          |
| MA0809.2 | TEAD4        | 6,29528    | 0,8085655 | S100A10 | 49  | 60  | + | ttgaattcctcc          |
| MA1115.1 | POU5F1       | 6,38031    | 0,8082708 | S100A10 | 273 | 283 | + | aaaagcaaaaa           |
| MA0143.4 | SOX2         | 5,53885    | 0,8081439 | S100A10 | 425 | 435 | - | gaacagtagat           |
| MA0144.2 | STAT3        | 0,872872   | 0,8081292 | S100A10 | 188 | 198 | + | cagattagaat           |
| MA0468.1 | DUX4         | 0,216561   | 0,8080556 | S100A10 | 66  | 76  | + | taactaaattt           |
| MA1588.1 | ZNF136       | 9,39566    | 0,8079884 | S100A10 | 186 | 200 | - | gtattctaactgat        |
| MA0047.3 | FOXA2        | 5,60052    | 0,8078565 | S100A10 | 63  | 73  | + | aggtaactaaa           |
| MA1648.1 | TCF12(var.2) | 5,86725    | 0,8075868 | S100A10 | 316 | 326 | - | aacacttgcta           |
| MA0593.1 | FOXP2        | 5,03596    | 0,8072891 | S100A10 | 309 | 319 | + | gagaaaatagc           |
| MA0090.3 | TEAD1        | 6,80235    | 0,8070529 | S100A10 | 2   | 14  | + | ggacattcaaagt         |
| MA0501.1 | MAF::NFE2    | 8,21556    | 0,8069284 | S100A10 | 255 | 269 | + | gtgagatagcagcac       |
| MA0143.4 | SOX2         | 5,45661    | 0,8063739 | S100A10 | 106 | 116 | + | aaactatgcag           |
| MA0523.1 | TCF7L2       | 4,61989    | 0,8062841 | S100A10 | 3   | 16  | + | gacattcaaagtag        |
| MA0595.1 | SREBF1       | 6,25698    | 0,806275  | S100A10 | 291 | 300 | - | ttcatcccat            |
| MA1123.2 | TWIST1       | 6,169      | 0,8062069 | S100A10 | 116 | 128 | + | gagaaagatgtct         |
| MA0095.2 | YY1          | 5,60002    | 0,8061252 | S100A10 | 119 | 130 | + | aaagatgtctcc          |
| MA1651.1 | ZFP42        | 10,6957    | 0,8060444 | S100A10 | 115 | 135 | + | agagaaagatgtctccgcctc |
| MA1102.2 | CTCFL        | 6,45287    | 0,806022  | S100A10 | 166 | 177 | + | tgtagagggcat          |
| MA0035.4 | GATA1        | 5,718      | 0,805759  | S100A10 | 328 | 338 | - | tccttctctc            |
| MA0143.4 | SOX2         | 5,41905    | 0,8055654 | S100A10 | 437 | 447 | - | caactatgaac           |
| MA1119.1 | SIX2         | 10,0303    | 0,8055497 | S100A10 | 298 | 313 | + | gaatgaacacgagaa       |
| MA0798.2 | RFX3         | 8,08141    | 0,8052886 | S100A10 | 148 | 161 | + | ctgttgctcagaca        |
| MA0468.1 | DUX4         | -0,0691959 | 0,804945  | S100A10 | 297 | 307 | + | tgaatgaaca            |
| MA1602.1 | ZSCAN29      | 5,58063    | 0,8046652 | S100A10 | 175 | 186 | - | tgccatacatg           |
| MA0516.1 | SP2          | 5,93889    | 0,8046323 | S100A10 | 18  | 32  | - | ctccctccctgagca       |
| MA0039.4 | KLF4         | 6,49423    | 0,8045273 | S100A10 | 22  | 33  | - | tctccctccctg          |

|          |         |           |           |         |     |     |   |                   |
|----------|---------|-----------|-----------|---------|-----|-----|---|-------------------|
| MA0035.4 | GATA1   | 5,65714   | 0,8044474 | S100A10 | 269 | 279 | - | tgcttttctag       |
| MA1116.1 | RBPJ    | 3,86607   | 0,8043235 | S100A10 | 40  | 49  | + | aatggaaaat        |
| MA0609.2 | CREM    | 9,28191   | 0,8040147 | S100A10 | 341 | 356 | - | agaatgacatgactgt  |
| MA0609.2 | CREM    | 9,27963   | 0,8039706 | S100A10 | 341 | 356 | + | acagtcatgtcattct  |
| MA1110.1 | NR1H4   | 7,24486   | 0,803782  | S100A10 | 346 | 356 | - | agaatgacatg       |
| MA0103.3 | ZEB1    | 3,60927   | 0,803724  | S100A10 | 206 | 216 | - | ctcacccttta       |
| MA1638.1 | HAND2   | 2,1092    | 0,8036502 | S100A10 | 183 | 192 | - | atctgatgcc        |
| MA0764.2 | ETV4    | 3,36865   | 0,8033691 | S100A10 | 315 | 324 | + | atagcaagtg        |
| MA0528.2 | ZNF263  | 6,89305   | 0,8027636 | S100A10 | 290 | 301 | + | gatgggatgaat      |
| MA0482.2 | GATA4   | 6,61168   | 0,8027627 | S100A10 | 113 | 124 | - | atctttctctgc      |
| MA0627.2 | POU2F3  | 6,00172   | 0,8026855 | S100A10 | 389 | 401 | - | catacgcaaaagg     |
| MA0627.2 | POU2F3  | 5,98732   | 0,8024554 | S100A10 | 189 | 201 | - | agtattctaactct    |
| MA1646.1 | OSR2    | 6,65574   | 0,8016227 | S100A10 | 408 | 419 | - | acacaggagtgcc     |
| MA0036.3 | GATA2   | 4,78667   | 0,8015323 | S100A10 | 269 | 279 | - | tgcttttctag       |
| MA1602.1 | ZSCAN29 | 5,36962   | 0,8013312 | S100A10 | 124 | 135 | + | tgtctccgcctc      |
| MA0510.1 | RFX5    | 2,3691    | 0,801189  | S100A10 | 137 | 151 | + | cttctaagacctgt    |
| MA0063.2 | NKX2-5  | 5,2039    | 0,8010871 | S100A10 | 265 | 275 | + | agcactagaaa       |
| MA0144.2 | STAT3   | 0,267713  | 0,800798  | S100A10 | 137 | 147 | - | gtcttaagaag       |
| MA0497.1 | MEF2C   | 5,06466   | 0,8007969 | S100A10 | 227 | 241 | - | aggataataacagcc   |
| MA0745.2 | SNAI2   | 5,16819   | 0,800704  | S100A10 | 359 | 371 | + | ctagacctgttta     |
| MA0083.2 | SRF     | 6,79671   | 0,800557  | S100A10 | 133 | 150 | - | cagggtctaagaaggag |
| MA0144.2 | STAT3   | 0,228613  | 0,8003243 | S100A10 | 93  | 103 | - | tctatggaaaa       |
| MA0468.1 | DUX4    | -0,496846 | 0,8002898 | S100A10 | 46  | 56  | + | aaattgaattc       |
| MA1647.1 | PRDM4   | 5,93769   | 0,8002695 | S100A10 | 428 | 438 | + | tactgttccgt       |
| MA0058.2 | MAX     | 1,7746    | 0,8002065 | S100A10 | 316 | 325 | + | tagcaagtgt        |

## References

1. Li, M.Z.1.; Elledge, S.J. SLIC: a method for sequence- and ligation-independent cloning. *Methods Mol. Biol.* **2012**, *852*, 51-59.
2. Pawlak, M.; Kikulska, A.; Wrzesinski, T.; Rausch, T.; Kwias, Z.; Wilczynski, B.; Benes, V.; Wesoly, J.; Wilanowski, T. Potential protective role of Grainyhead-like genes in the development of clear cell renal cell carcinoma. *Mol. Carcinog.* **2017**, *56*, 2414-2423
